# Supplementary material
Source: PubMed Central journal article supplement (PMC4178609)
Supplement: AEM.01775-14_zam999105659so1.pdf [file AEM.01775-14_zam999105659so1.pdf]

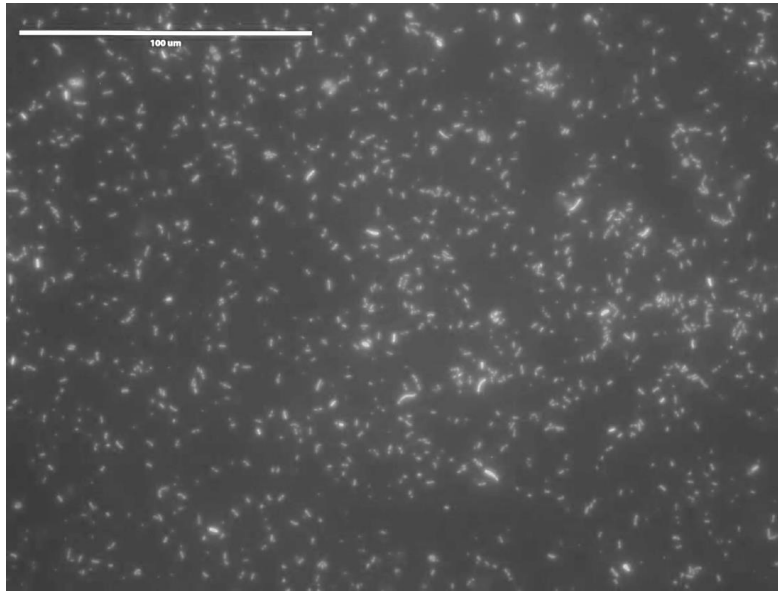

**Figure S.1.** *H. defensa* from hemolymph samples.

**Table S.1.** Estimates of selection (s) from linear regression of logit (infection frequency) over time. Slopes for each cage (6 total) and mean slopes for replicate cages at each temperature are included in the table; t-test, p-values\*\*\* represent significance; n= data points. ‡ Slope is through day 58; † Slope is through day 72; Slopes at 25°C, through day 114

| T    | Cage | Slope    | R <sup>2</sup> | n  | Mean Slope | p-values    |
|------|------|----------|----------------|----|------------|-------------|
| 20°C | 4‡   | -0.05349 | 0.916519       | 14 | -0.0516359 | p<0.0001*** |
|      | 5†   | -0.0533  | 0.941883       |    |            |             |
|      | 6†   | -0.04872 | 0.756261       |    |            |             |
| 25°C | 1    | -0.02604 | 0.812523       | 24 | -0.0290507 | p<0.0001*** |
|      | 2    | -0.03796 | 0.93586        |    |            |             |
|      | 3    | -0.02315 | 0.821796       |    |            |             |
